# Supplementary material for: Proximal aortic stiffening in Turner patients may be present before dilation can be detected: a segmental functional MRI study
Source: J Cardiovasc Magn Reson. 2017 Feb 13;19:27. doi: 10.1186/s12968-017-0331-0 (PMC5320803; doi:10.1186/s12968-017-0331-0)
Supplement: Additional file 4: Table S1. — Supplemental Table S1 A and B. F and p values of PWV, aortic area and aortic distensibility in amultivariate GLM including age, height, weight, heart rate and blood pressure as confounders, performedseperately within each of both groups: Turner patients (S1A) and controls (S1B). (XLSX 17 kb) [file 12968_2017_331_MOESM4_ESM.xlsx]

## Sheet: Table S1 A and B
S1 A
Turner	Age		height		Weight		Heart Rate		Systolic BP
	F	p	F	p	F	p	F	p	F	p
ln(Thoracic PWV)	8.31031	0.00638221	3.01109	0.0905938	0.015836	0.900504	0.92597	0.341841	0.198364	0.658507
ln(Abdominal PWV)	4.17391	0.0478502	0.838645	0.365413	1.31255	0.258915	0.230327	0.633962	5.18083	0.028408
ln(Aortic PWV)	8.63313	0.0055189	2.61395	0.113989	0.50155	0.483031	0.0276707	0.868745	2.40948	0.128681
ln(Ascending Aortic Area)	27.4266	5.91315e-06	1.73295	0.19572	2.53825	0.119192	6.84553	0.0125768	0.010123	0.920373
ln(Descending Aortic Area)	9.3106	0.00398541	0.00111173	0.973563	0.647495	0.425651	0.453329	0.504536	0.132611	0.717612
ln(Diaphragmatic Aortic Area)	22.325	2.70469e-05	0.0170264	0.896821	5.84091	0.0201929	1.00234	0.322617	0.204139	0.653782
ln(Distal Abdominal Aortic Area)	13.1768	0.000778985	0.000750813	0.978273	6.71672	0.0131734	0.647218	0.425749	2.2252	0.14343
ln(Ascending Aortic Distensibility)	7.05514	0.011489	0.526322	0.472602	0.642241	0.427883	1.36416	0.250094	2.47494	0.123964
ln(Descending Aortic Distensibility)	6.51972	0.014586	0.62196	0.434969	0.119047	0.731879	5.16243	0.0285301	7.38718	0.00966354
ln(Diaphragmatic Aortic Distensibility)	9.9104	0.00310272	0.00177642	0.966591	1.33654	0.254504	2.68664	0.109036	5.67018	0.0221049
ln(Distal Abdominal Aortic Distensibility)	4.35548	0.0434744	2.58136	0.116196	1.85553	0.180957	1.26195	0.26815	10.3313	0.00262631
S1 B
Control	Age		height		Weight		Heart Rate		Systolic BP
	F	p	F	p	F	p	F	p	F	p
ln(Thoracic PWV)	7.16814	0.0116097	1.71618	0.199512	0.686137	0.413617	0.318613	0.576378	0.343099	0.562155
ln(Abdominal PWV)	16.5887	0.000285218	0.000208368	0.988573	0.798806	0.378124	9.632	0.00398065	0.245569	0.623599
ln(Aortic PWV)	18.3314	0.000157829	1.38818	0.247401	0.0668881	0.797579	1.13499	0.294685	0.139457	0.711284
ln(Ascending Aortic Area)	4.64844	0.0387042	0.0440076	0.835169	1.27437	0.267341	0.626155	0.434596	0.0419965	0.838924
ln(Descending Aortic Area)	10.6459	0.00262518	0.0169618	0.897194	0.00404414	0.949689	0.331455	0.56883	0.403756	0.529674
ln(Diaphragmatic Aortic Area)	43.3622	2.01811e-07	0.324103	0.573127	0.0204476	0.887191	0.00951668	0.922895	0.383339	0.540205
ln(Distal Abdominal Aortic Area)	4.66201	0.0386905	0.0963874	0.758287	6.79546	0.0139252	0.740849	0.395997	0.265314	0.610146
ln(Ascending Aortic Distensibility)	26.7453	1.20636e-05	0.876813	0.356089	0.0238367	0.878271	0.886983	0.353352	4.52047	0.0413022
ln(Descending Aortic Distensibility)	4.63891	0.0388914	0.0962048	0.758444	1.56014	0.220704	0.655425	0.424159	0.166163	0.686259
ln(Diaphragmatic Aortic Distensibility)	11.7946	0.00166248	1.04065	0.315321	0.452334	0.506056	0.430947	0.516218	6.59047	0.0151307
ln(Distal Abdominal Aortic Distensibility)	11.6808	0.00178518	0.984119	0.328865	1.35306	0.25362	0.138134	0.712672	0.379352	0.542447
