# Supplementary material for: Proximal aortic stiffening in Turner patients may be present before dilation can be detected: a segmental functional MRI study
Source: Springer Nature journal article supplement (doi:10.1186/s12968-017-0331-0), 2016-12-01

# Velocity Graph

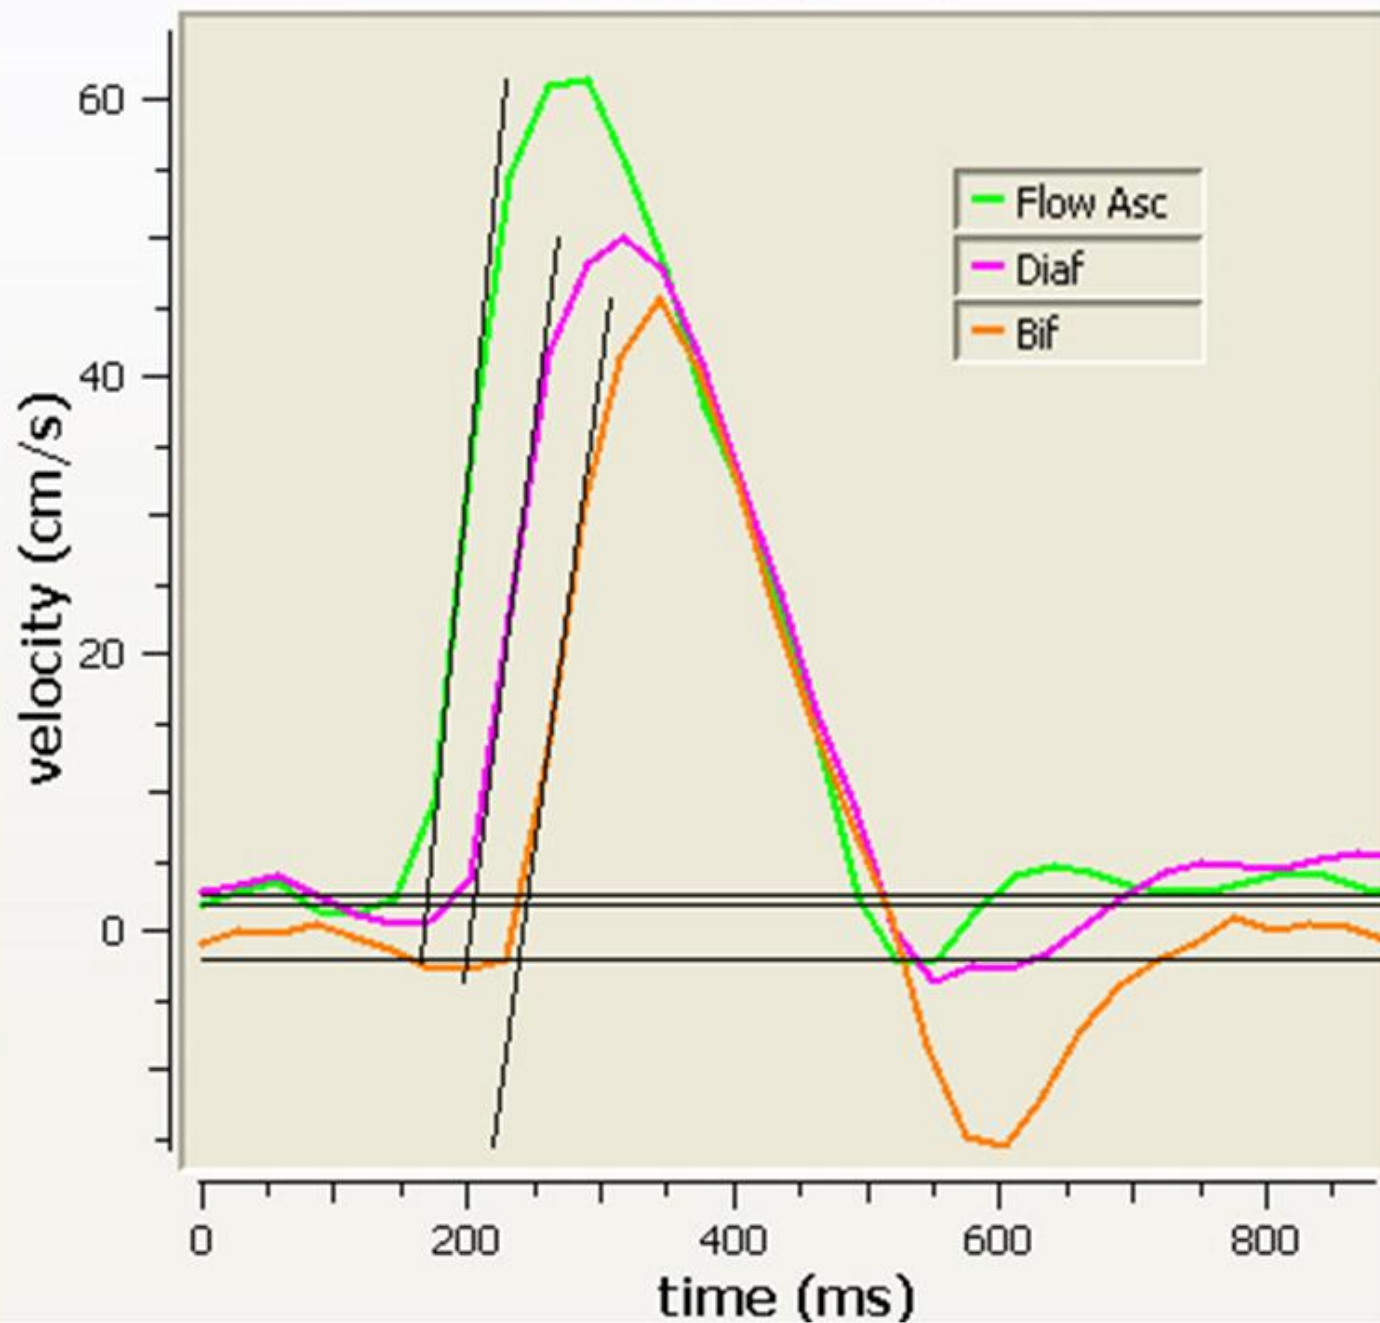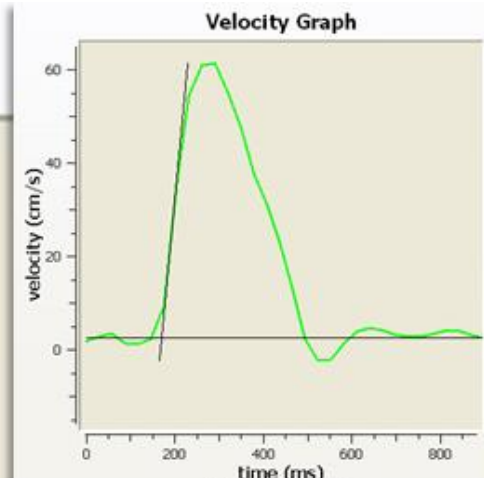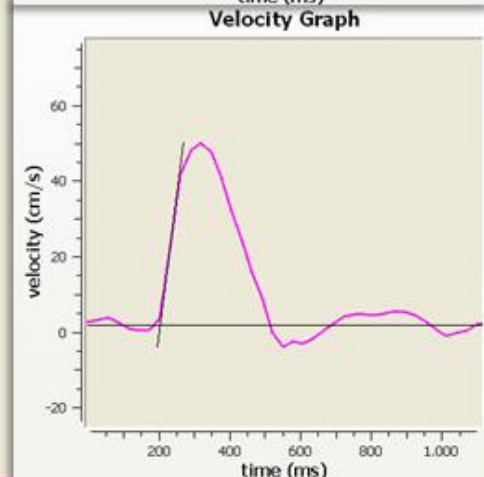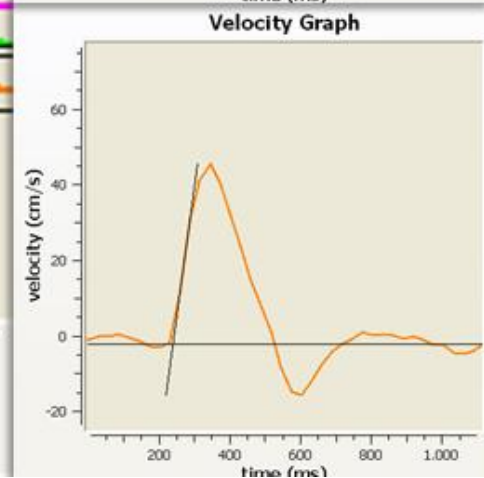

Supplement: MOESM3 [file 12085546]
